# Supplementary material for: Three new phosphates with isolated P2O7units: noncentrosymmetric Cs2Ba3(P2O7)2and centrosymmetric Cs2BaP2O7and LiCsBaP2O7
Source: Royal Society of Chemistry journal article supplement (doi:10.1039/c5dt05026j), 2016-01-01
Supplement: c5dt05026j1.pdf [file c5dt05026j1.pdf]

**Three New Phosphates with Isolated  $P_2O_7$  unit:  
Noncentrosymmetric  $Cs_2Ba_3(P_2O_7)_2$  and Centrosymmetric  
 $Cs_2BaP_2O_7$ ,  $LiCsBaP_2O_7$**

Lin Li,<sup>a,b</sup> Shujuan Han,<sup>\*a</sup> Bing-Hua Lei,<sup>a,b</sup> Ying Wang,<sup>a</sup> Hongyi Li,<sup>a</sup> Zhihua Yang,<sup>a</sup> and Shilie Pan<sup>\*a</sup>

*<sup>a</sup>Key Laboratory of Functional Materials and Devices for Special Environments of CAS;*

*Xinjiang Key Laboratory of Electronic Information Materials and Devices;*

*Xinjiang Technical Institute of Physics & Chemistry of CAS, 40-1 South Beijing Road, Urumqi  
830011, China.*

*<sup>b</sup>University of Chinese Academy of Sciences, Beijing 100049, China.*

*To whom correspondence should be addressed.*

*E-mail: slpan@ms.xjb.ac.cn (Shilie Pan); hansj@ms.xjb.ac.cn (Shujuan Han)*

*Phone: (+86)991-3674558, Fax: (+86)991-3838957*

Table S1a. Atomic coordinates ( $\times 10^4$ ) and equivalent isotropic displacement parameters ( $\text{\AA}^2 \times 10^3$ ) for  $\text{Cs}_2\text{Ba}_3(\text{P}_2\text{O}_7)_2$ .  $U_{(\text{eq})}$  is defined as one third of the trace of the orthogonalized  $U_{ij}$  tensor.

| Atom | x       | y        | z       | $U_{(\text{eq})}$ | BVS  |
|------|---------|----------|---------|-------------------|------|
| Ba1  | 5671(1) | 5264(1)  | 92(1)   | 15(1)             | 2.02 |
| Ba2  | 4163(1) | 11470(1) | 1155(1) | 17(1)             | 2.07 |
| Ba3  | 7515(1) | 8338(1)  | 1630(1) | 15(1)             | 1.92 |
| Cs1  | 2675(1) | 6683(1)  | 1696(1) | 27(1)             | 0.98 |
| Cs2  | 827(1)  | 8083(1)  | 3717(1) | 21(1)             | 1.13 |
| P1   | 2122(2) | 4076(1)  | 55(1)   | 13(1)             | 4.92 |
| P2   | 4807(2) | 8733(2)  | -101(1) | 13(1)             | 4.96 |
| P3   | 1192(2) | 10441(2) | 2056(1) | 13(1)             | 4.95 |
| P4   | 3967(2) | 9589(2)  | 2859(1) | 15(1)             | 4.97 |
| O1   | 8544(4) | 5246(4)  | 7(3)    | 24(1)             | 2.13 |
| O2   | 3321(4) | 3882(4)  | 616(3)  | 24(1)             | 2.03 |
| O3   | 2750(5) | 4612(4)  | -643(2) | 28(1)             | 1.92 |
| O4   | 4533(5) | 7639(4)  | -676(3) | 23(1)             | 2.17 |
| O5   | 6158(4) | 9661(4)  | -409(2) | 15(1)             | 2.25 |
| O6   | 5327(5) | 8072(5)  | 587(2)  | 26(1)             | 1.87 |
| O7   | 5076(5) | 9829(5)  | 2265(2) | 26(1)             | 1.91 |
| O8   | 4128(5) | 8170(4)  | 3200(3) | 36(1)             | 2.03 |
| O9   | 3859(5) | 10754(5) | 3397(2) | 26(1)             | 1.91 |
| O10  | 2344(4) | 9441(4)  | 2481(2) | 23(1)             | 2.34 |
| O11  | 1437(5) | 10076(5) | 1271(2) | 26(1)             | 1.99 |
| O12  | 1747(5) | 11913(4) | 2197(2) | 24(1)             | 1.97 |
| O13  | -329(5) | 10085(5) | 2318(3) | 29(1)             | 1.84 |
| O14  | 1149(4) | 2807(4)  | -41(3)  | 23(1)             | 1.91 |

Table S1b. Atomic coordinates ( $\times 10^4$ ) and equivalent isotropic displacement parameters ( $\text{\AA}^2 \times 10^3$ ) for  $\text{Cs}_2\text{BaP}_2\text{O}_7$ .  $U_{(\text{eq})}$  is defined as one third of the trace of the orthogonalized  $U_{ij}$  tensor.

| Atom | x        | y       | z       | U(eq) | BVS  |
|------|----------|---------|---------|-------|------|
| Cs1  | 3619(1)  | 2354(1) | 8433(1) | 32(1) | 0.90 |
| Cs2  | 6408(1)  | 2239(1) | 6740(1) | 22(1) | 1.05 |
| Ba1  | 7511(1)  | 2573(1) | 9915(1) | 13(1) | 2.26 |
| P1   | 4593(1)  | 7237(2) | 6355(1) | 13(1) | 4.93 |
| P2   | 9682(1)  | 2401(2) | 6415(1) | 13(1) | 5.07 |
| O1   | 8991(3)  | 291(6)  | 6444(3) | 19(1) | 2.05 |
| O2   | 5975(3)  | 7130(6) | 6310(3) | 26(1) | 2.07 |
| O3   | 3946(3)  | 5050(6) | 6262(3) | 28(1) | 2.00 |
| O4   | 4610(4)  | 8125(7) | 7447(3) | 31(1) | 2.20 |
| O5   | 3805(4)  | 8937(6) | 5685(3) | 29(1) | 1.92 |
| O6   | 10777(4) | 2223(7) | 5935(4) | 40(1) | 2.00 |
| O7   | 8799(4)  | 4260(6) | 6028(3) | 37(1) | 1.98 |

Table S1c. Atomic coordinates ( $\times 10^4$ ) and equivalent isotropic displacement parameters ( $\text{\AA}^2 \times 10^3$ ) for  $\text{LiCsBaP}_2\text{O}_7$ .  $U_{(\text{eq})}$  is defined as one third of the trace of the orthogonalized  $U_{ij}$  tensor.

| Atom | x        | y       | z       | U(eq) | BVS  |
|------|----------|---------|---------|-------|------|
| Ba1  | 8067(1)  | 4432(1) | 1226(1) | 13(1) | 2.13 |
| Cs1  | 7497(1)  | 8269(1) | -40(1)  | 25(1) | 0.87 |
| Li1  | 6662(10) | 2599(6) | 3594(6) | 18(1) | 1.05 |
| P1   | 3778(1)  | 4849(1) | 1975(1) | 12(1) | 4.92 |
| P2   | 8385(1)  | 1356(1) | 1634(1) | 12(1) | 4.94 |
| O1   | 6559(4)  | 459(2)  | 1726(2) | 16(1) | 2.17 |
| O2   | 4655(4)  | 5857(2) | 1299(2) | 16(1) | 1.82 |
| O3   | 1818(4)  | 4419(2) | 1115(2) | 17(1) | 1.99 |
| O4   | 8804(4)  | 2211(2) | 2799(2) | 18(1) | 1.85 |
| O5   | 5208(4)  | 3806(2) | 2447(3) | 19(1) | 1.96 |
| O6   | 7582(4)  | 2062(2) | 389(2)  | 18(1) | 1.85 |
| O7   | 10055(4) | 502(2)  | 1612(3) | 20(1) | 2.06 |

Table S2a. Selected bond lengths [ $\text{\AA}$ ] and angles [deg] for  $\text{Cs}_2\text{Ba}_3(\text{P}_2\text{O}_7)_2$ 

|                |          |                    |            |
|----------------|----------|--------------------|------------|
| Ba(1)-O(1)     | 2.596(4) | Cs(2)-O(5)#13      | 3.251(4)   |
| Ba(1)-O(11)#1  | 2.658(5) | Cs(2)-O(13)        | 3.408(5)   |
| Ba(1)-O(2)     | 2.685(4) | Cs(2)-O(13)#10     | 3.498(5)   |
| Ba(1)-O(6)     | 2.869(5) | Cs(2)-O(11)#10     | 3.538(5)   |
| Ba(1)-O(4)     | 2.884(5) | P(1)-O(3)          | 1.512(4)   |
| Ba(1)-O(9)#2   | 2.894(5) | P(1)-O(14)         | 1.512(4)   |
| Ba(1)-O(14)#3  | 2.983(4) | P(1)-O(2)          | 1.517(4)   |
| Ba(1)-O(3)     | 3.035(5) | P(1)-O(5)#8        | 1.633(4)   |
| Ba(2)-O(8)#6   | 2.549(4) | P(2)-O(6)          | 1.509(4)   |
| Ba(2)-O(2)#7   | 2.639(4) | P(2)-O(1)#8        | 1.513(4)   |
| Ba(2)-O(7)     | 2.731(5) | P(2)-O(4)          | 1.523(4)   |
| Ba(2)-O(1)#8   | 2.783(5) | P(2)-O(5)          | 1.615(4)   |
| Ba(2)-O(11)    | 2.807(5) | P(3)-O(13)         | 1.496(5)   |
| Ba(2)-O(14)#1  | 2.834(5) | P(3)-O(12)         | 1.522(4)   |
| Ba(2)-O(12)    | 2.952(5) | P(3)-O(11)         | 1.524(5)   |
| Ba(3)-O(12)#2  | 2.668(5) | P(3)-O(10)         | 1.623(4)   |
| Ba(3)-O(3)#1   | 2.708(4) | P(4)-O(9)          | 1.508(5)   |
| Ba(3)-O(4)#1   | 2.715(4) | P(4)-O(8)          | 1.511(4)   |
| Ba(3)-O(9)#2   | 2.775(5) | P(4)-O(7)          | 1.512(5)   |
| Ba(3)-O(6)     | 2.786(4) | P(4)-O(10)         | 1.631(4)   |
| Ba(3)-O(13)#9  | 2.872(5) | O(2)-Ba(1)-O(3)    | 51.55(13)  |
| Ba(3)-O(7)     | 2.880(5) | O(6)-Ba(1)-O(3)    | 104.23(12) |
| Cs(1)-O(10)    | 3.043(4) | O(4)-Ba(1)-O(3)    | 68.26(11)  |
| Cs(1)-O(5)#8   | 3.054(4) | O(10)-Cs(1)-O(6)   | 91.20(12)  |
| Cs(1)-O(13)#10 | 3.198(5) | O(5)#8-Cs(1)-O(6)  | 90.03(11)  |
| Cs(1)-O(9)#2   | 3.255(5) | O(1)-Ba(1)-O(9)#2  | 85.08(14)  |
| Cs(1)-O(7)#2   | 3.324(5) | O(8)-Cs(1)-O(6)    | 93.85(12)  |
| Cs(1)-O(8)     | 3.413(5) | O(2)-Cs(1)-O(6)    | 80.23(11)  |
| Cs(1)-O(2)     | 3.414(5) | O(8)-Cs(1)-O(11)   | 85.44(10)  |
| Cs(1)-O(6)     | 3.434(5) | O(2)-Cs(1)-O(11)   | 130.34(11) |
| Cs(1)-O(4)#8   | 3.477(5) | O(6)-Cs(1)-O(11)   | 74.10(11)  |
| Cs(1)-O(11)    | 3.536(5) | O(4)#8-Cs(1)-O(11) | 56.41(10)  |
| Cs(2)-O(10)    | 2.984(5) | O(3)-P(1)-O(14)    | 113.0(3)   |
| Cs(2)-O(14)#11 | 3.061(5) | O(3)-P(1)-O(2)     | 111.7(3)   |
| Cs(2)-O(12)#10 | 3.093(4) | O(14)-P(1)-O(2)    | 113.3(2)   |
| Cs(2)-O(3)#12  | 3.129(5) | O(3)-P(1)-O(5)#8   | 107.2(2)   |
| Cs(2)-O(8)     | 3.130(6) | O(14)-P(1)-O(5)#8  | 109.8(2)   |
| Cs(2)-O(1)#6   | 3.213(5) | O(2)-P(1)-O(5)#8   | 101.0(2)   |

Symmetry transformations used to generate equivalent atoms:

|                          |                       |                       |                           |
|--------------------------|-----------------------|-----------------------|---------------------------|
| #1 $x, y, z-1$           | #2 $-x+1, -y+2, z-1$  | #3 $x, y-1/2, z-1/2$  | #4 $x, y, z+1$            |
| #5 $-x+1/2, y, z$        | #6 $-x+1/2, y, z+1$   | #7 $-x+1, -y+2, z$    | #8 $-x+1, -y+2, z+1$      |
| #9 $-x+1, -y+5/2, z-1/2$ | #10 $x, y+1/2, z+1/2$ | #11 $x, y+1/2, z-1/2$ | #12 $-x+1, -y+5/2, z+1/2$ |
| #13 $x, y+1/2, z+3/2$    | #14 $x, y-1/2, z+1/2$ |                       |                           |

Table S2b. Selected bond lengths [ $\text{\AA}$ ] and angles [deg] for  $\text{Cs}_2\text{BaP}_2\text{O}_7$ 

|                     |            |                     |            |
|---------------------|------------|---------------------|------------|
| Cs(1)-O(1)#1        | 3.116(4)   | Cs(2)-O(5)#3        | 3.464(4)   |
| Cs(1)-O(6)#1        | 3.155(5)   | Cs(2)-O(4)#3        | 3.488(5)   |
| Cs(1)-O(3)#2        | 3.230(4)   | Ba(1)-O(6)#6        | 2.623(4)   |
| Cs(1)-O(4)#3        | 3.256(4)   | Ba(1)-O(7)#4        | 2.631(4)   |
| Cs(1)-O(7)#4        | 3.293(4)   | Ba(1)-O(5)#7        | 2.637(4)   |
| Cs(1)-O(5)#2        | 3.305(4)   | Ba(1)-O(3)#8        | 2.644(4)   |
| Cs(1)-O(6)#4        | 3.309(4)   | Ba(1)-O(2)#4        | 2.657(4)   |
| Cs(1)-O(4)#2        | 3.400(4)   | Ba(1)-O(1)#1        | 2.718(3)   |
| Cs(1)-O(3)          | 3.539(4)   | P(1)-O(2)           | 1.506(4)   |
| Cs(2)-O(3)          | 3.091(4)   | P(1)-O(5)           | 1.507(4)   |
| Cs(2)-O(2)          | 3.094(4)   | P(1)-O(3)           | 1.510(4)   |
| Cs(2)-O(1)          | 3.152(3)   | P(1)-O(4)           | 1.607(4)   |
| Cs(2)-O(2)#3        | 3.225(4)   | P(2)-O(7)           | 1.498(4)   |
| Cs(2)-O(7)          | 3.239(4)   | P(2)-O(6)           | 1.501(4)   |
| Cs(2)-O(1)#1        | 3.263(4)   | P(2)-O(1)           | 1.508(4)   |
| Cs(2)-O(2)#4        | 3.354(4)   | P(2)-O(4)#4         | 1.624(4)   |
| Cs(2)-O(5)#5        | 3.390(4)   |                     |            |
| O(6)#1-Cs(1)-O(6)#4 | 146.02(17) | O(6)#6-Ba(1)-O(7)#4 | 86.62(15)  |
| O(3)#2-Cs(1)-O(6)#4 | 69.99(10)  | O(6)#6-Ba(1)-O(5)#7 | 96.70(13)  |
| O(5)#2-Cs(1)-O(6)#4 | 107.76(10) | O(7)#4-Ba(1)-O(5)#7 | 174.39(13) |
| O(1)#1-Cs(1)-O(4)#2 | 133.52(9)  | O(6)#6-Ba(1)-O(3)#8 | 90.82(13)  |
| O(6)#1-Cs(1)-O(4)#2 | 94.72(11)  | O(7)#4-Ba(1)-O(3)#8 | 90.61(13)  |
| O(3)#2-Cs(1)-O(4)#2 | 44.06(9)   | O(5)#7-Ba(1)-O(3)#8 | 93.86(12)  |
| O(4)#3-Cs(1)-O(4)#2 | 112.22(11) | O(7)#4-Ba(1)-O(1)#1 | 89.62(12)  |
| O(3)-Cs(2)-O(5)#3   | 71.86(9)   | O(5)#7-Ba(1)-O(1)#1 | 85.97(12)  |
| O(2)-Cs(2)-O(5)#3   | 115.50(9)  | O(2)-P(1)-O(4)      | 106.6(2)   |
| O(1)-Cs(2)-O(5)#3   | 111.25(9)  | O(5)-P(1)-O(4)      | 102.0(2)   |
| O(2)#3-Cs(2)-O(5)#3 | 44.22(9)   | O(3)-P(1)-O(4)      | 106.1(2)   |
| O(7)-Cs(2)-O(5)#3   | 135.83(11) | O(7)-P(2)-O(6)      | 113.3(3)   |
| O(5)#5-Cs(2)-O(5)#3 | 67.54(11)  | O(7)-P(2)-O(1)      | 113.7(2)   |
| O(3)-Cs(2)-O(4)#3   | 87.90(10)  | O(6)-P(2)-O(1)      | 113.5(2)   |
| O(2)-Cs(2)-O(4)#3   | 134.47(9)  | O(7)-P(2)-O(4)#4    | 103.2(3)   |
| O(1)-Cs(2)-O(4)#3   | 109.32(9)  | O(6)-P(2)-O(4)#4    | 103.2(3)   |

Symmetry transformations used to generate equivalent atoms:

|                            |                             |                            |
|----------------------------|-----------------------------|----------------------------|
| #1 $-x+3/2, y+1/2, -z+3/2$ | #2 $-x+1/2, y-1/2, -z+3/2$  | #3 $x, y-1, z$             |
| #4 $-x+3/2, y-1/2, -z+3/2$ | #5 $-x+1, -y+1, -z+1$       | #6 $x-1/2, -y+1/2, z+1/2$  |
| #7 $x+1/2, -y+3/2, z+1/2$  | #8 $x+1/2, -y+1/2, z+1/2$   | #9 $-x+1, -y, -z+2$        |
| #10 $-x+1, -y+1, -z+2$     | #11 $-x+1/2, y+1/2, -z+3/2$ | #12 $x, y+1, z$            |
| #13 $x+1/2, -y+1/2, z-1/2$ | #14 $x-1/2, -y+1/2, z-1/2$  | #15 $x-1/2, -y+3/2, z-1/2$ |

Table S2c. Selected bond lengths [ $\text{\AA}$ ] and angles [deg] for  $\text{LiCsBaP}_2\text{O}_7$ 

|                     |           |                     |            |
|---------------------|-----------|---------------------|------------|
| Ba(1)-O(7)#1        | 2.611(3)  | O(5)-Ba(1)-O(2)     | 52.79(7)   |
| Ba(1)-O(3)#2        | 2.690(3)  | O(3)#3-Ba(1)-O(2)   | 90.74(7)   |
| Ba(1)-O(6)          | 2.709(3)  | O(7)#1-Ba(1)-O(2)#3 | 158.79(8)  |
| Ba(1)-O(5)          | 2.773(3)  | O(2)-Ba(1)-O(2)#3   | 74.39(8)   |
| Ba(1)-O(3)#3        | 2.820(3)  | O(7)#1-Ba(1)-O(4)   | 83.28(8)   |
| Ba(1)-O(2)          | 2.884(3)  | O(3)#2-Ba(1)-O(4)   | 89.77(8)   |
| Ba(1)-O(2)#3        | 2.885(3)  | O(6)-Ba(1)-O(4)     | 52.73(7)   |
| Ba(1)-O(4)          | 2.902(3)  | O(5)-Ba(1)-O(4)     | 64.13(8)   |
| Cs(1)-O(7)#5        | 3.030(3)  | O(3)#3-Ba(1)-O(4)   | 146.96(7)  |
| Cs(1)-O(1)#6        | 3.212(3)  | O(2)-Ba(1)-O(4)     | 116.64(7)  |
| Cs(1)-O(3)#3        | 3.213(3)  | O(2)#3-Ba(1)-O(4)   | 115.15(7)  |
| Cs(1)-O(7)#6        | 3.244(3)  | O(7)#5-Cs(1)-O(1)#6 | 104.07(7)  |
| Cs(1)-O(4)#1        | 3.247(3)  | O(7)#5-Cs(1)-O(3)#3 | 91.98(7)   |
| Cs(1)-O(1)#3        | 3.258(3)  | O(1)#6-Cs(1)-O(3)#3 | 162.62(7)  |
| Cs(1)-O(6)#3        | 3.531(3)  | O(7)#5-Cs(1)-O(7)#6 | 69.96(8)   |
| Cs(1)-O(5)#3        | 3.564(3)  | O(1)#6-Cs(1)-O(7)#6 | 45.76(7)   |
| Cs(1)-O(6)#5        | 3.620(3)  | O(3)#3-Cs(1)-O(7)#6 | 138.95(7)  |
| Li(1)-O(6)#8        | 1.893(7)  | O(7)#5-Cs(1)-O(4)#1 | 95.61(7)   |
| Li(1)-O(5)          | 1.896(7)  | O(1)#6-Cs(1)-O(4)#1 | 94.49(6)   |
| Li(1)-O(4)          | 1.973(7)  | O(3)#3-Cs(1)-O(4)#1 | 77.07(6)   |
| Li(1)-O(2)#9        | 2.120(7)  | O(7)#6-Cs(1)-O(4)#1 | 68.85(7)   |
| P(1)-O(5)           | 1.510(3)  | O(7)#5-Cs(1)-O(1)#3 | 93.25(7)   |
| P(1)-O(3)           | 1.517(3)  | O(1)#6-Cs(1)-O(1)#3 | 73.96(7)   |
| P(1)-O(2)           | 1.531(3)  | O(3)#3-Cs(1)-O(1)#3 | 112.30(6)  |
| P(1)-O(1)#7         | 1.614(3)  | O(5)-P(1)-O(3)      | 113.24(16) |
| P(2)-O(7)           | 1.506(3)  | O(5)-P(1)-O(2)      | 111.73(15) |
| P(2)-O(6)           | 1.509(3)  | O(3)-P(1)-O(2)      | 110.63(15) |
| P(2)-O(4)           | 1.518(3)  | O(5)-P(1)-O(1)#7    | 105.00(15) |
| P(2)-O(1)           | 1.640(3)  | O(3)-P(1)-O(1)#7    | 109.04(15) |
| O(7)#1-Ba(1)-O(3)#2 | 76.63(8)  | O(2)-P(1)-O(1)#7    | 106.81(14) |
| O(3)#2-Ba(1)-O(6)   | 91.08(8)  | O(7)-P(2)-O(4)      | 114.01(16) |
| O(7)#1-Ba(1)-O(5)   | 87.24(8)  | O(6)-P(2)-O(4)      | 111.23(15) |
| O(6)-Ba(1)-O(5)     | 83.17(8)  | O(6)-P(2)-O(1)      | 103.73(15) |
| O(3)#2-Ba(1)-O(3)#3 | 72.42(9)  | O(6)#8-Li(1)-O(5)   | 120.2(4)   |
| O(6)-Ba(1)-O(3)#3   | 98.91(7)  | O(6)#8-Li(1)-O(4)   | 112.7(4)   |
| O(5)-Ba(1)-O(3)#3   | 136.60(8) | O(5)-Li(1)-O(4)     | 102.3(3)   |
| O(7)#1-Ba(1)-O(2)   | 88.21(8)  | O(6)#8-Li(1)-O(2)#9 | 98.8(3)    |
| O(6)-Ba(1)-O(2)     | 118.89(8) | O(4)-Li(1)-O(2)#9   | 103.5(3)   |

Symmetry transformations used to generate equivalent atoms:

|                        |                     |                    |                       |
|------------------------|---------------------|--------------------|-----------------------|
| #1 x, y, z-1           | #2 -x+1, -y+2, z-1  | #3 x, y-1/2, z-1/2 | #4 x, y, z+1          |
| #5 -x+1/2, y, z        | #6 -x+1/2, y, z+1   | #7 -x+1, -y+2, z   | #8 -x+1, -y+2, z+1    |
| #9 -x+1, -y+5/2, z-1/2 | #10 x, y+1/2, z+1/2 | #11 x,y+1/2,z-1/2  | #12 -x+1,-y+5/2,z+1/2 |
| #13 x, y+1/2, z+3/2    | #14 x, y-1/2, z+1/2 |                    |                       |

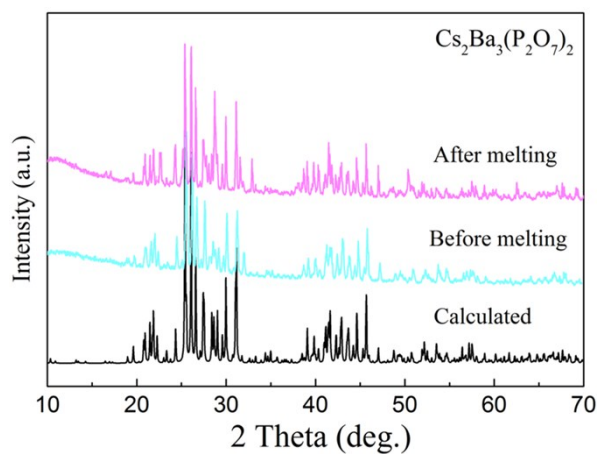

Figure S1a. Experimental and calculated XRD patterns of  $\text{Cs}_2\text{Ba}_3(\text{P}_2\text{O}_7)_2$ .

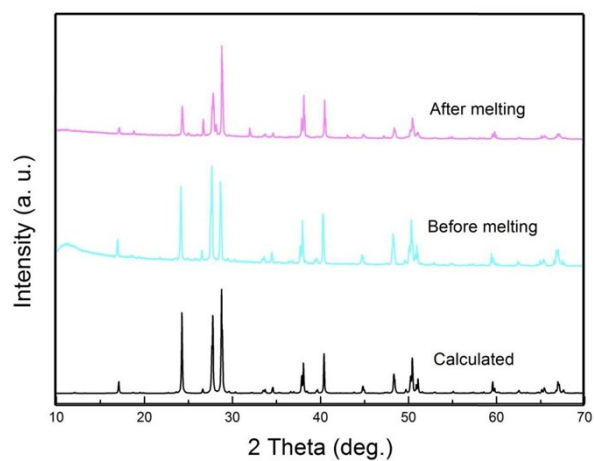

Figure S1b. Experimental and calculated XRD patterns of  $\text{Cs}_2\text{BaP}_2\text{O}_7$ .

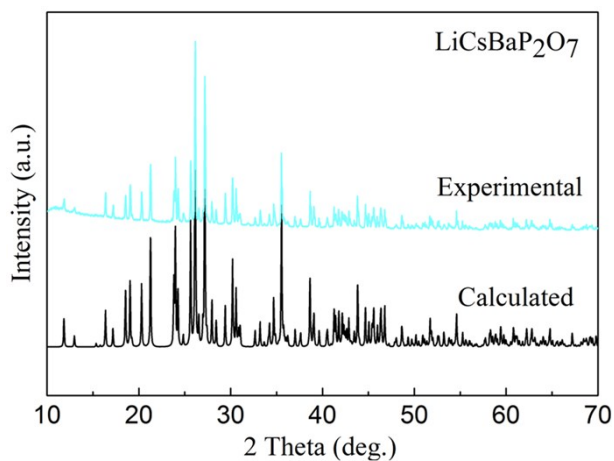

Figure S1c. Experimental and calculated XRD patterns of  $\text{LiCsBaP}_2\text{O}_7$ .



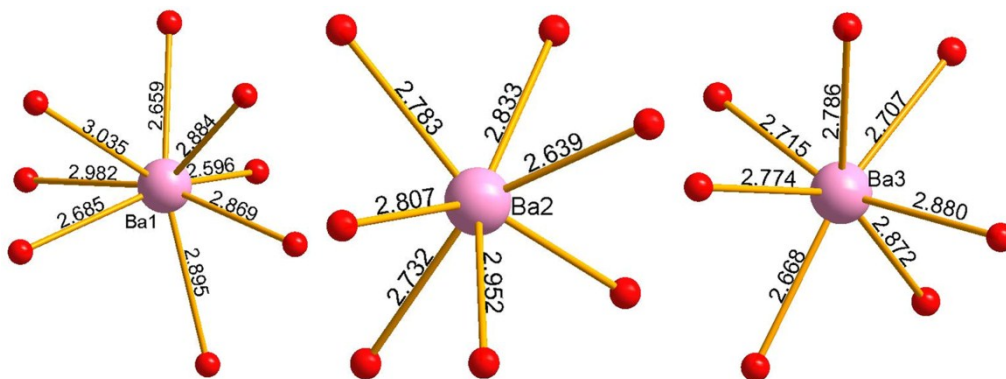

Figure S2a. Coordination environment of the Ba atoms in  $\text{Cs}_2\text{Ba}_3(\text{P}_2\text{O}_7)_2$ .

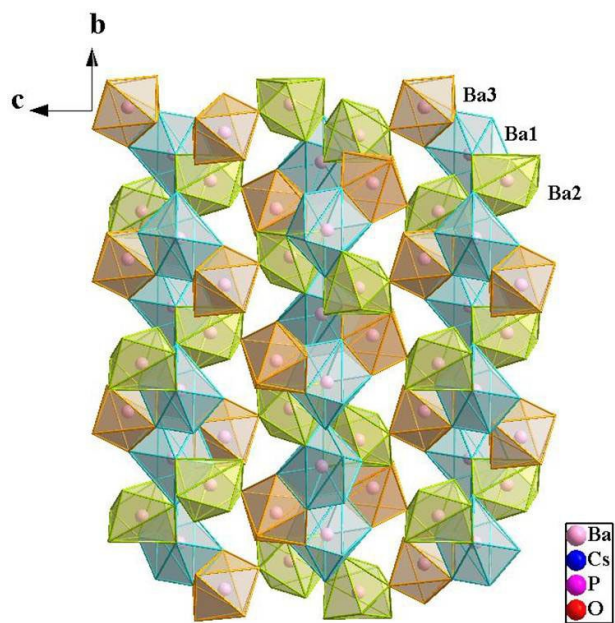

Figure S2b. The 3D network of  $\text{Cs}_2\text{Ba}_3(\text{P}_2\text{O}_7)_2$  built by  $\text{BaO}_n$  ( $n = 7,8$ ).

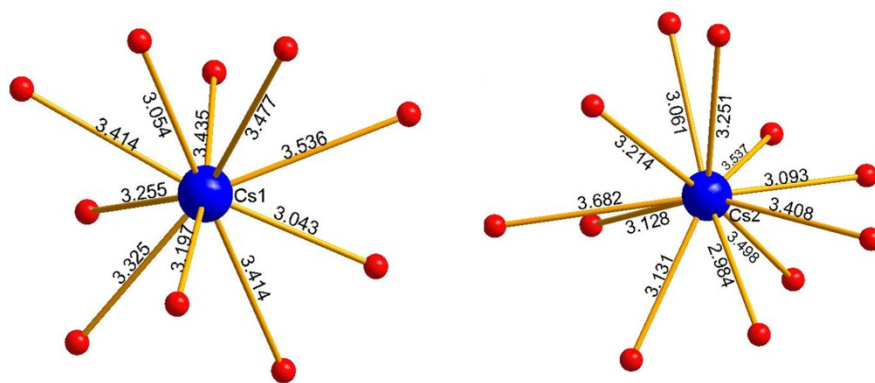

Figure S3. Coordination environment of the Cs atoms in  $\text{Cs}_2\text{Ba}_3(\text{P}_2\text{O}_7)_2$ .

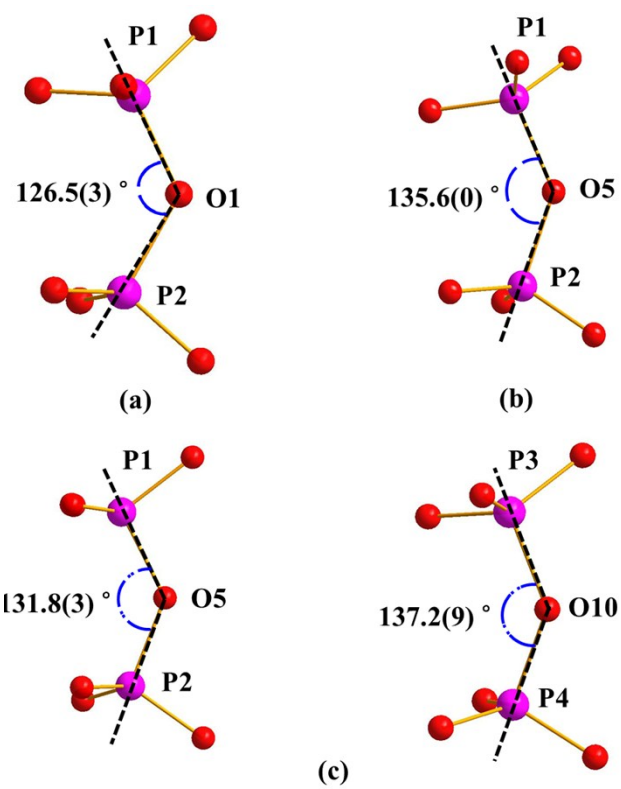

Figure S4. The  $P_2O_7$  unit of (a)  $LiCsBaP_2O_7$ , (b)  $Cs_2BaP_2O_7$  and (c)  $Cs_2Ba_3(P_2O_7)_2$ .

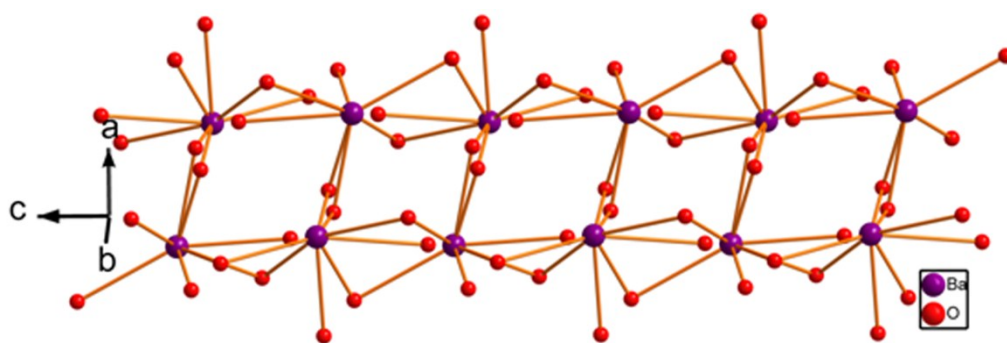

Figure S5. The 1D chain formed by the BaO<sub>8</sub> polyhedra in Li<sub>2</sub>BaP<sub>2</sub>O<sub>7</sub>.

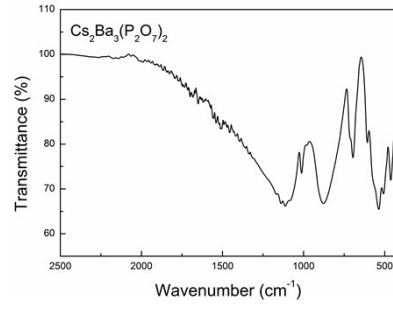

(a)

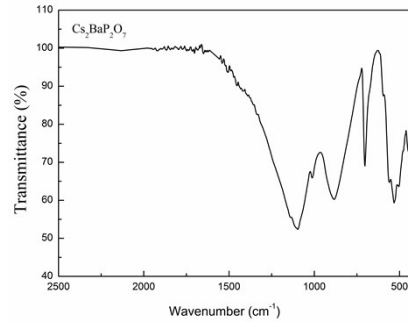

(b)

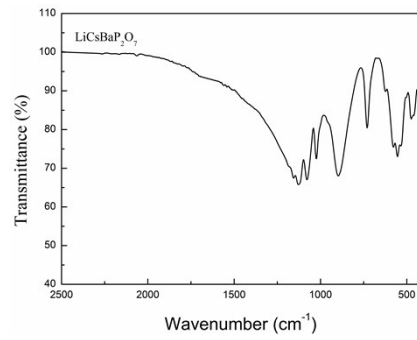

(c)

Figure S6. IR spectra of (a)  $\text{Cs}_2\text{Ba}_3(\text{P}_2\text{O}_7)_2$ ; (b)  $\text{Cs}_2\text{BaP}_2\text{O}_7$ ; (c)  $\text{LiCsBaP}_2\text{O}_7$ .

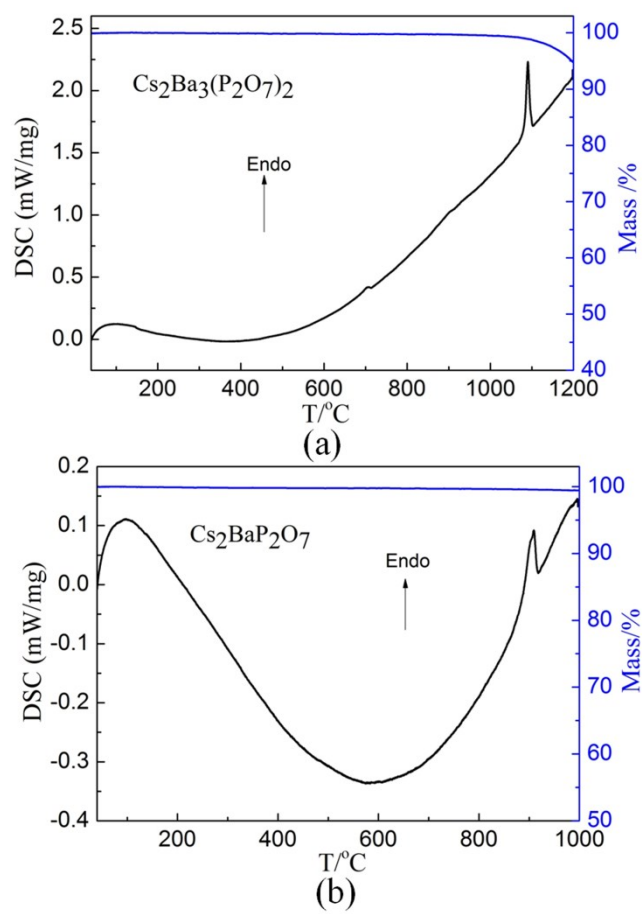

Figure S7. DSC-TG curves of  $\text{Cs}_2\text{Ba}_3(\text{P}_2\text{O}_7)_2$  and  $\text{Cs}_2\text{BaP}_2\text{O}_7$ .
